# Supplementary material for: Synthesis, structural evolution, and optical properties of SnO2 hollow microspheres with manageable shell thickness
Source: Royal Society of Chemistry journal article supplement (doi:10.1039/d1ce00801c), 2021-01-01
Supplement: d1ce00801c1.pdf [file d1ce00801c1.pdf]

**Electronic Supplementary Information (ESI)**

**Synthesis, structural evolution, and optical properties of SnO<sub>2</sub> hollow  
microspheres with manageable shell thickness**

Xin Zhang,<sup>\*a</sup> Xueyan Jia,<sup>a</sup> Zihang Shi,<sup>a</sup> Bolun Song,<sup>b</sup> and Yongan Niu<sup>\*b</sup>

*a Shenyang University of Chemical Technology, School of Chemical Engineering, Shenyang, 110142, P.  
R. China.*

*Email: [zhangxin0406@126.com](mailto:zhangxin0406@126.com)*

*b Shenyang University of Chemical Technology, School of Materials Science and Technology, Shenyang,  
110142, P. R. China.*

*E-mail: [niuyongan@163.com](mailto:niuyongan@163.com)*

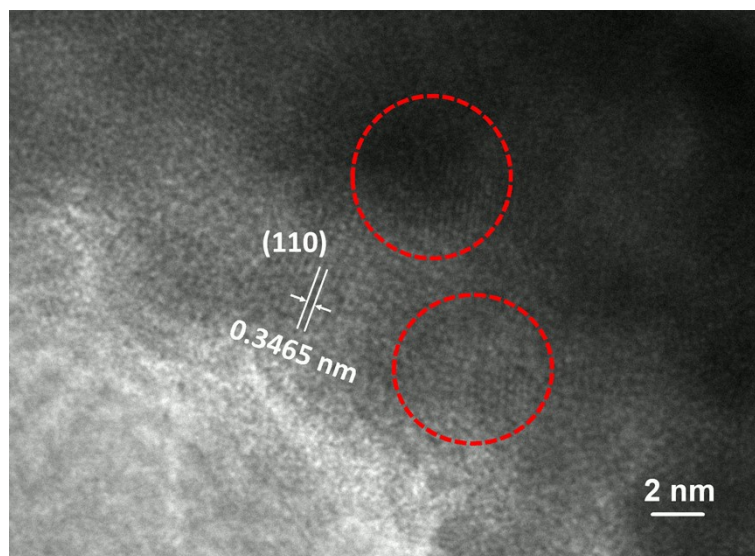

Fig. S1 HRTEM image of as-prepared H-SnO<sub>2</sub>-70 microsphere.

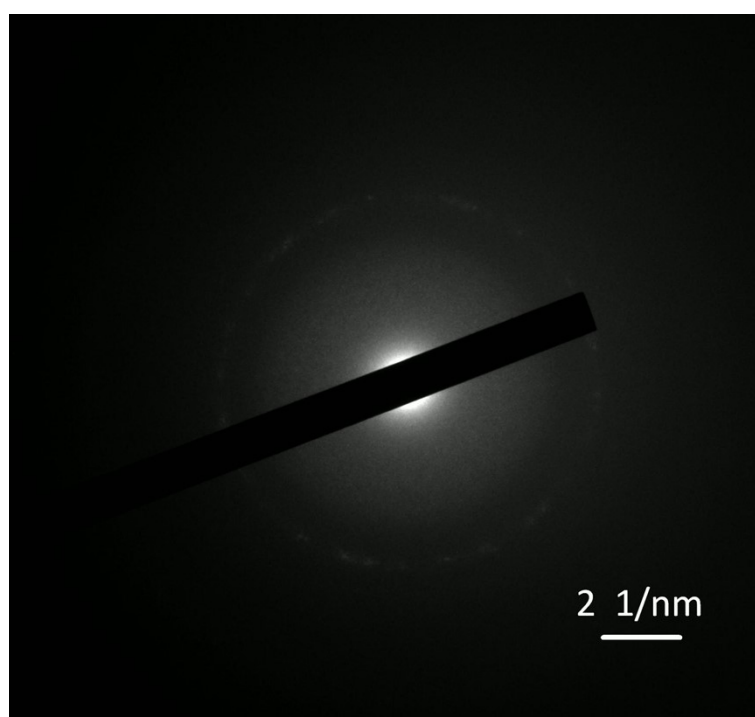

Fig. S2 SEAD pattern of as-prepared H-SnO<sub>2</sub>-70 microsphere.

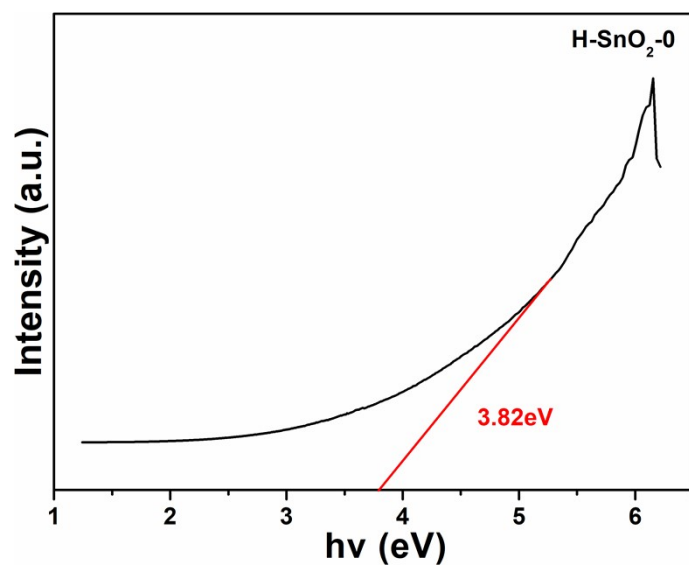

Fig. S3 The optical band gaps of as-prepared H-SnO<sub>2</sub>-0 microsphere.

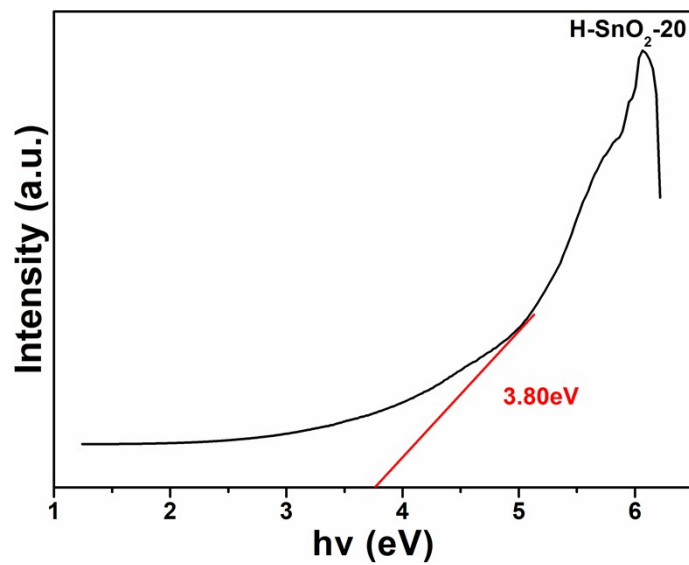

Fig. S4 The optical band gaps of as-prepared H-SnO<sub>2</sub>-20 microsphere.

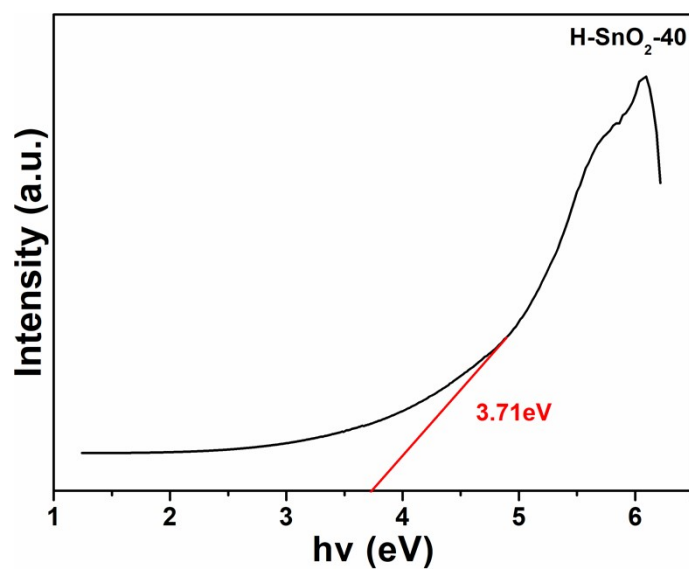

Fig. S5 The optical band gaps of as-prepared H-SnO<sub>2</sub>-40 microsphere.

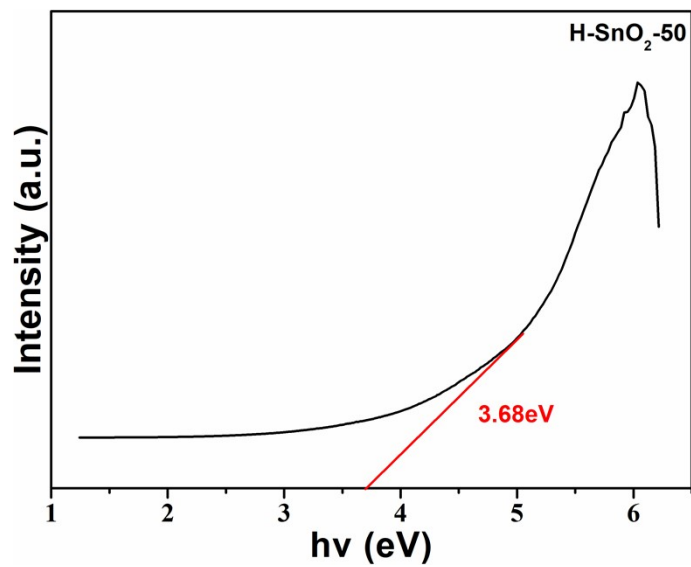

Fig. S6 The optical band gaps of as-prepared H-SnO<sub>2</sub>-50 microsphere.

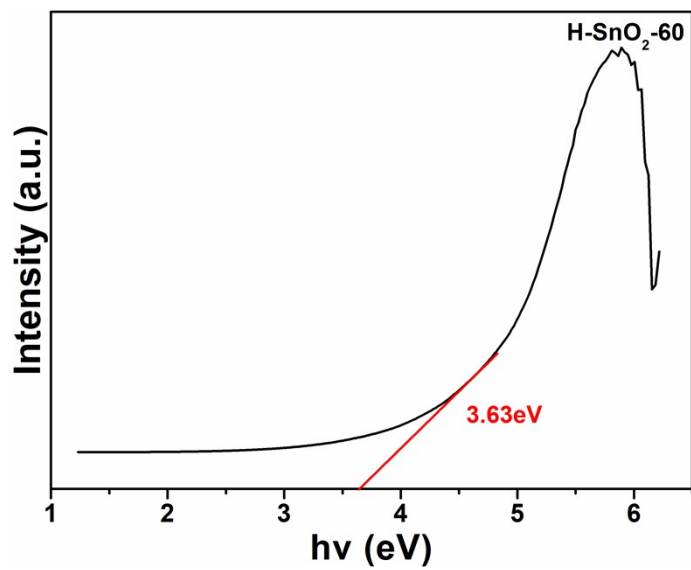

Fig. S7 The optical band gaps of as-prepared H-SnO<sub>2</sub>-60 microsphere.

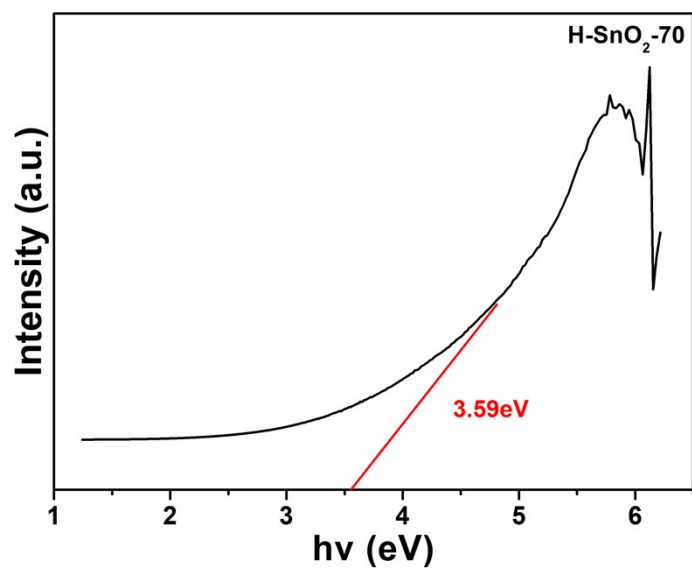

Fig. S8 The optical band gaps of as-prepared H-SnO<sub>2</sub>-70 microsphere.

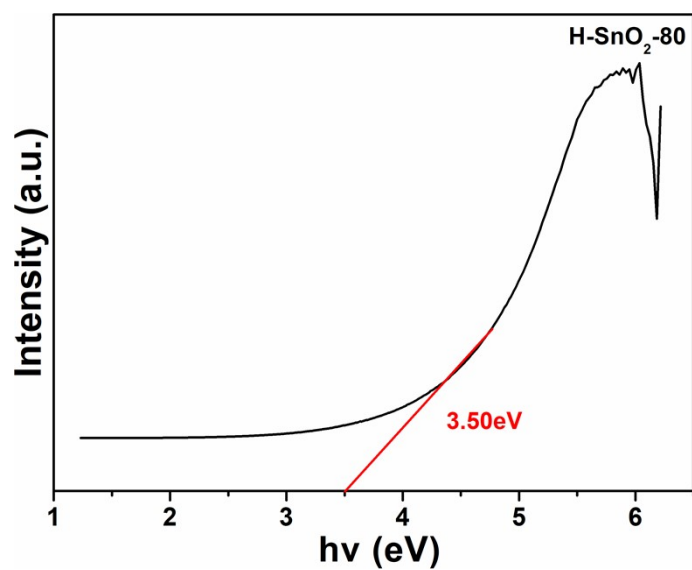

Fig. S9 The optical band gaps of as-prepared H-SnO<sub>2</sub>-80 microsphere.

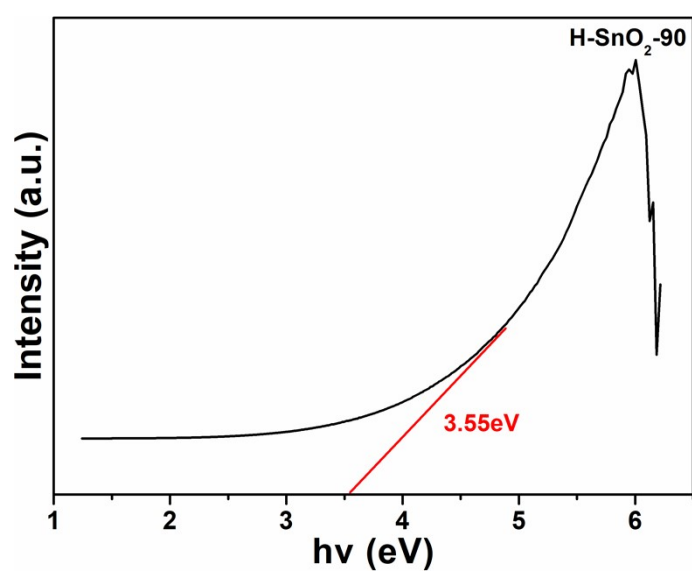

Fig. S10 The optical band gaps of as-prepared H-SnO<sub>2</sub>-90 microsphere.

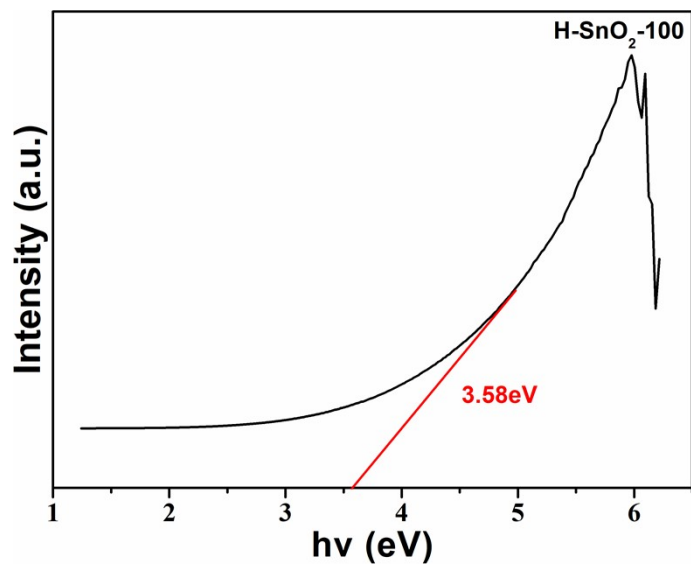

Fig. S11 The optical band gaps of as-prepared H-SnO<sub>2</sub>-100 microsphere.
